# Supplementary material for: A protective mechanism of heat inactivation to enhance Levilactobacillus brevis PDD-2 against alcohol-induced chronic liver disease based on proteomic analysis
Source: Royal Society of Chemistry journal article supplement (doi:10.1039/d4fo01051e), 2024-01-01
Supplement: d4fo01051e1.pdf [file d4fo01051e1.pdf]

Table S1 Groups of experimental mice and their daily treatments

| group   | Gavage dose                                                                      |
|---------|----------------------------------------------------------------------------------|
| Control | 0.2 mL 0.9% NaCl                                                                 |
| Model   | 0.2 mL 0.9% NaCl                                                                 |
| H-LB    | 0.2 mL high dose of <i>L. brevis</i> PDD-2 ( $2 \times 10^9$ CFU/mL)             |
| L-LB    | 0.2 mL low dose of <i>L. brevis</i> PDD-2 ( $2 \times 10^7$ CFU/mL)              |
| HI-LB   | 0.2 mL high dose of heat-killed <i>L. brevis</i> PDD-2 ( $2 \times 10^9$ CFU/mL) |
| LI-LB   | 0.2 mL low dose of heat-killed <i>L. brevis</i> PDD-2 ( $2 \times 10^7$ CFU/mL)  |
| PC      | 0.2 mL silymarin (100 mg/kg body)                                                |

Table S2 Diet ingredients of mice in each group

| Ingredients        | group               |                 |                            |                 |
|--------------------|---------------------|-----------------|----------------------------|-----------------|
|                    | Control liquid diet |                 | Lieber-DeCarli liquid diet |                 |
|                    | weight(g)           | Calories (kcal) | weight (g)                 | Calories (kcal) |
| casein             | 41.4                | 166             | 41.4                       | 166             |
| L-cystine          | 0.5                 | 2               | 0.5                        | 2               |
| DL-Methionine      | 0.3                 | 1               | 0.3                        | 1               |
| Maltodextrin       | 115.2               | 461             | 25.6                       | 102             |
| Cellulose          | 10                  | 0               | 10                         | 0               |
| Xanthan Gum        | 3                   | 0               | 3                          | 0               |
| Corn oil           | 8.5                 | 77              | 8.5                        | 77              |
| Olive oil          | 28.4                | 256             | 28.4                       | 256             |
| Safflower seed oil | 2.7                 | 24              | 2.7                        | 24              |
| Mineral Complex    | 8.75                | 4               | 8.75                       | 4               |
| Multivitamin       | 2.5                 | 9               | 2.5                        | 9               |
| Choline Tartrate   | 0.53                | 0               | 0.53                       | 0               |
| 95% Alcohol        | 0                   | 0               | 67 mL                      | 358             |

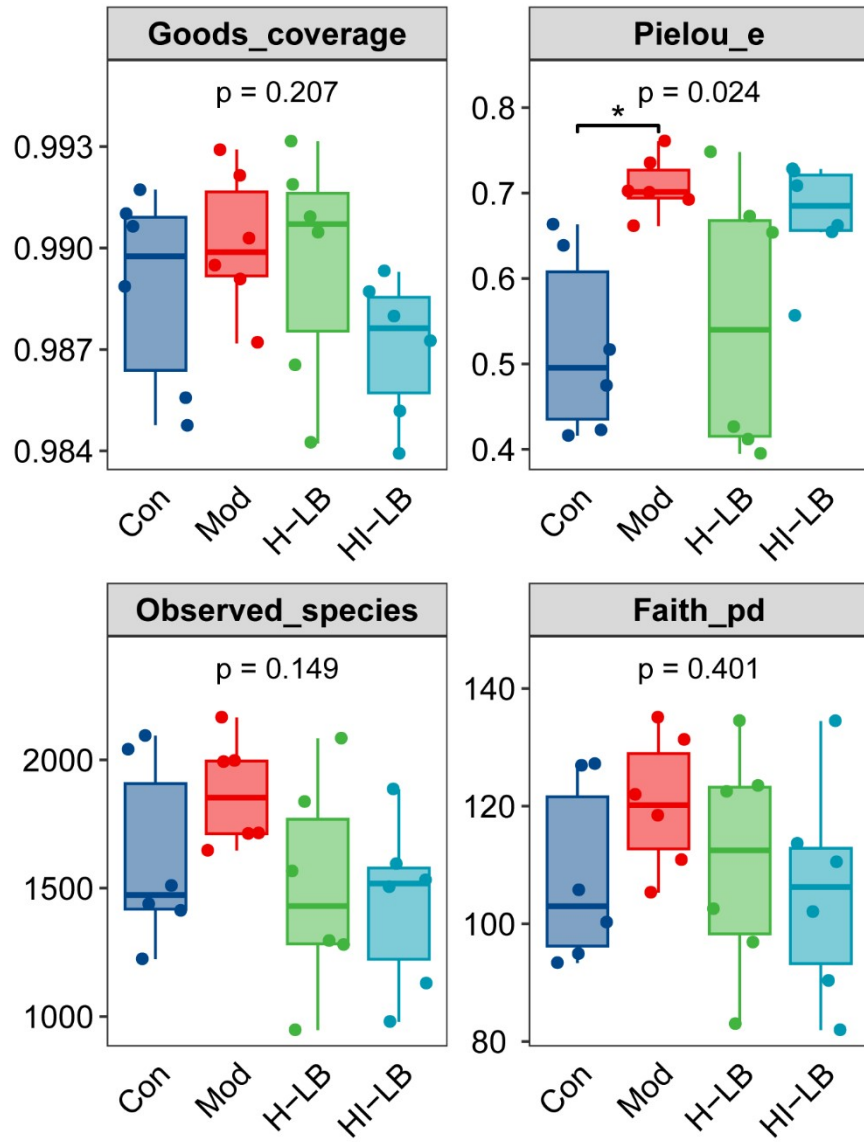

Fig. S1 Effect of *L. brevis* PDD-2 and heat-inactivated *L. brevis* PDD-2 on alpha diversity (n=6).

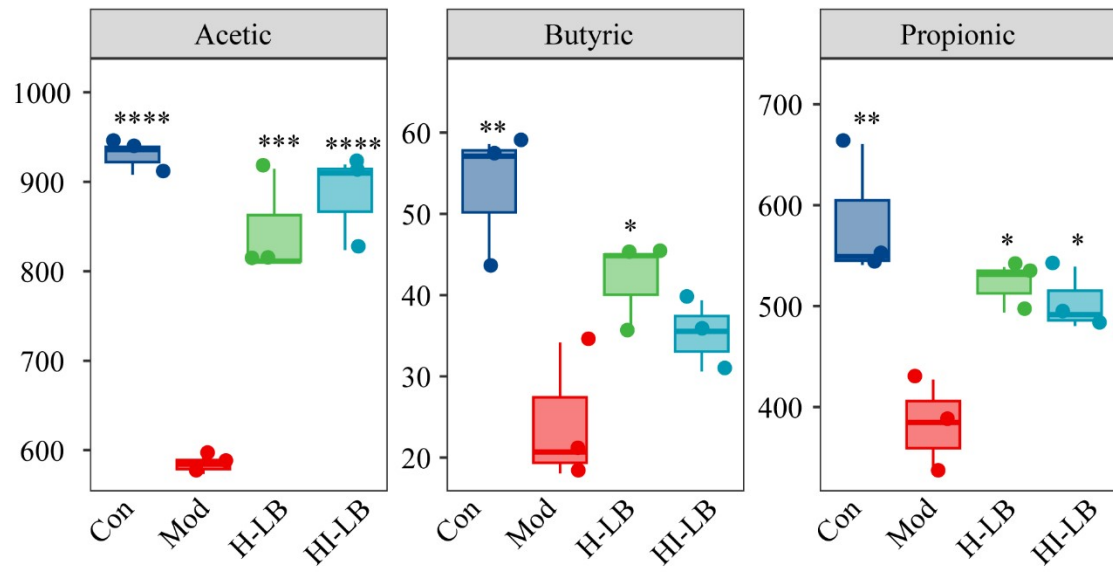

**Fig. S2** Effect of *L. brevis* PDD-2 and heat-inactivated *L. brevis* PDD-2 on the levels of short-chain fatty acids (SCFAs) in intestinal contents (n=3).
